# Supplementary material
Source: PubMed Central journal article supplement (PMC7233286)
Supplement: NIHMS1585722-supplement-Suppl_data.pdf [file NIHMS1585722-supplement-Suppl_data.pdf]

## Appendix A. Supplementary data

The following is the supplementary data related to this article:

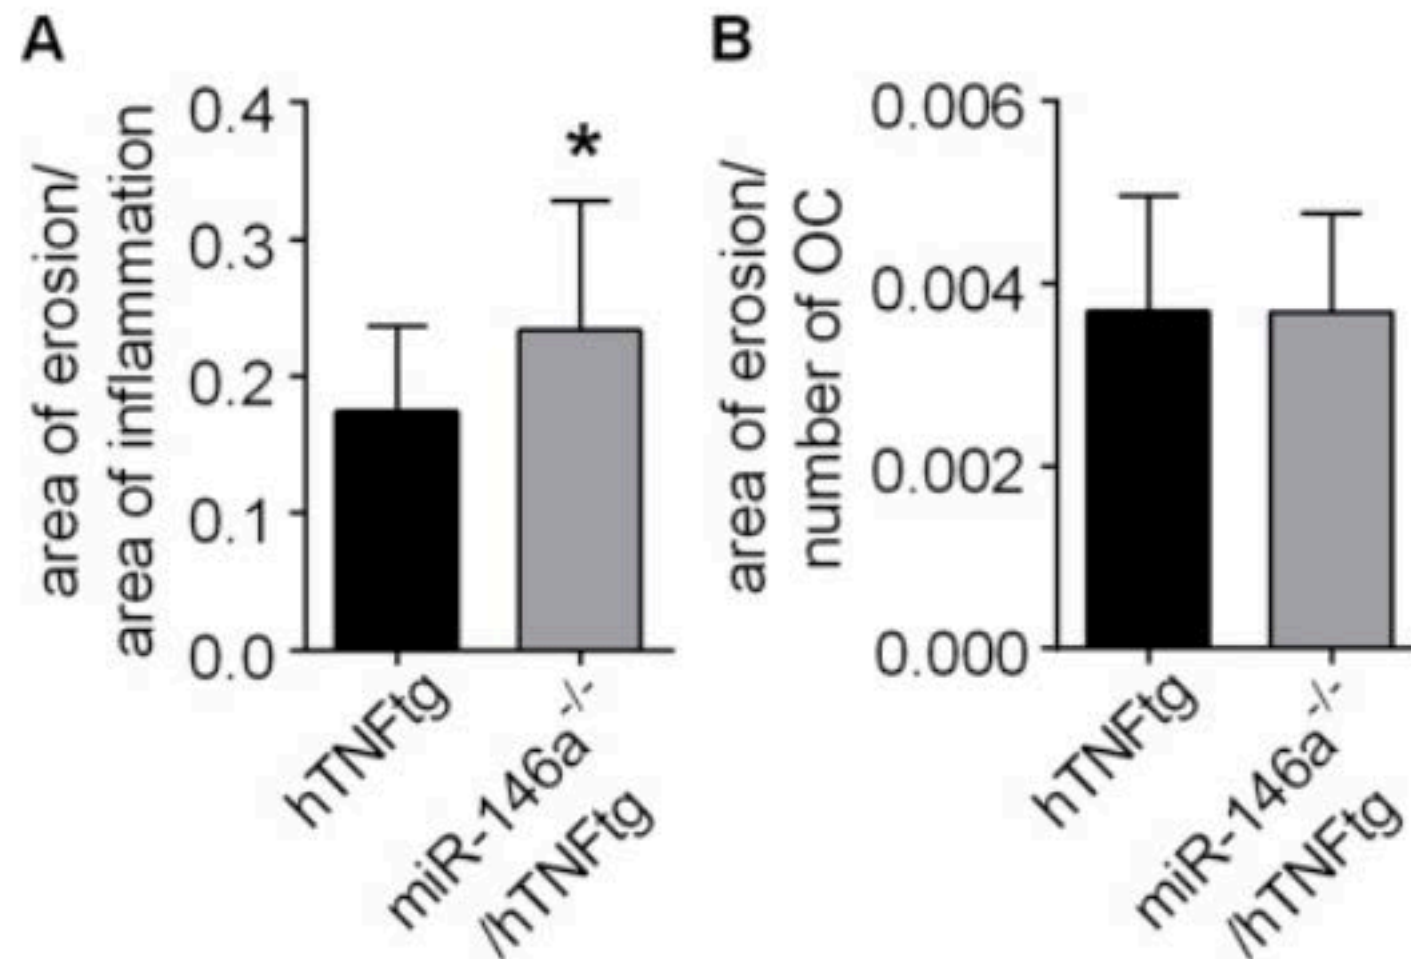

[Download](#) : [Download high-res image \(188KB\)](#)

[Download](#) : [Download full-size image](#)

S1. Increased [osteoclast](#) numbers account for elevated bone erosion in [miR-146a<sup>-/-</sup>/hTNFtg](#) animals. A, Histomorphometric analysis of the extent of area of erosion per area of inflammation and B, area of erosion per number of osteoclast; in the tarsal area of the [hind paws](#) of hTNFtg (n = 16) and miR-146a<sup>-/-</sup>/hTNFtg (n = 15) mice. \*p < 0,05 Results are shown as mean ± [SEM](#).

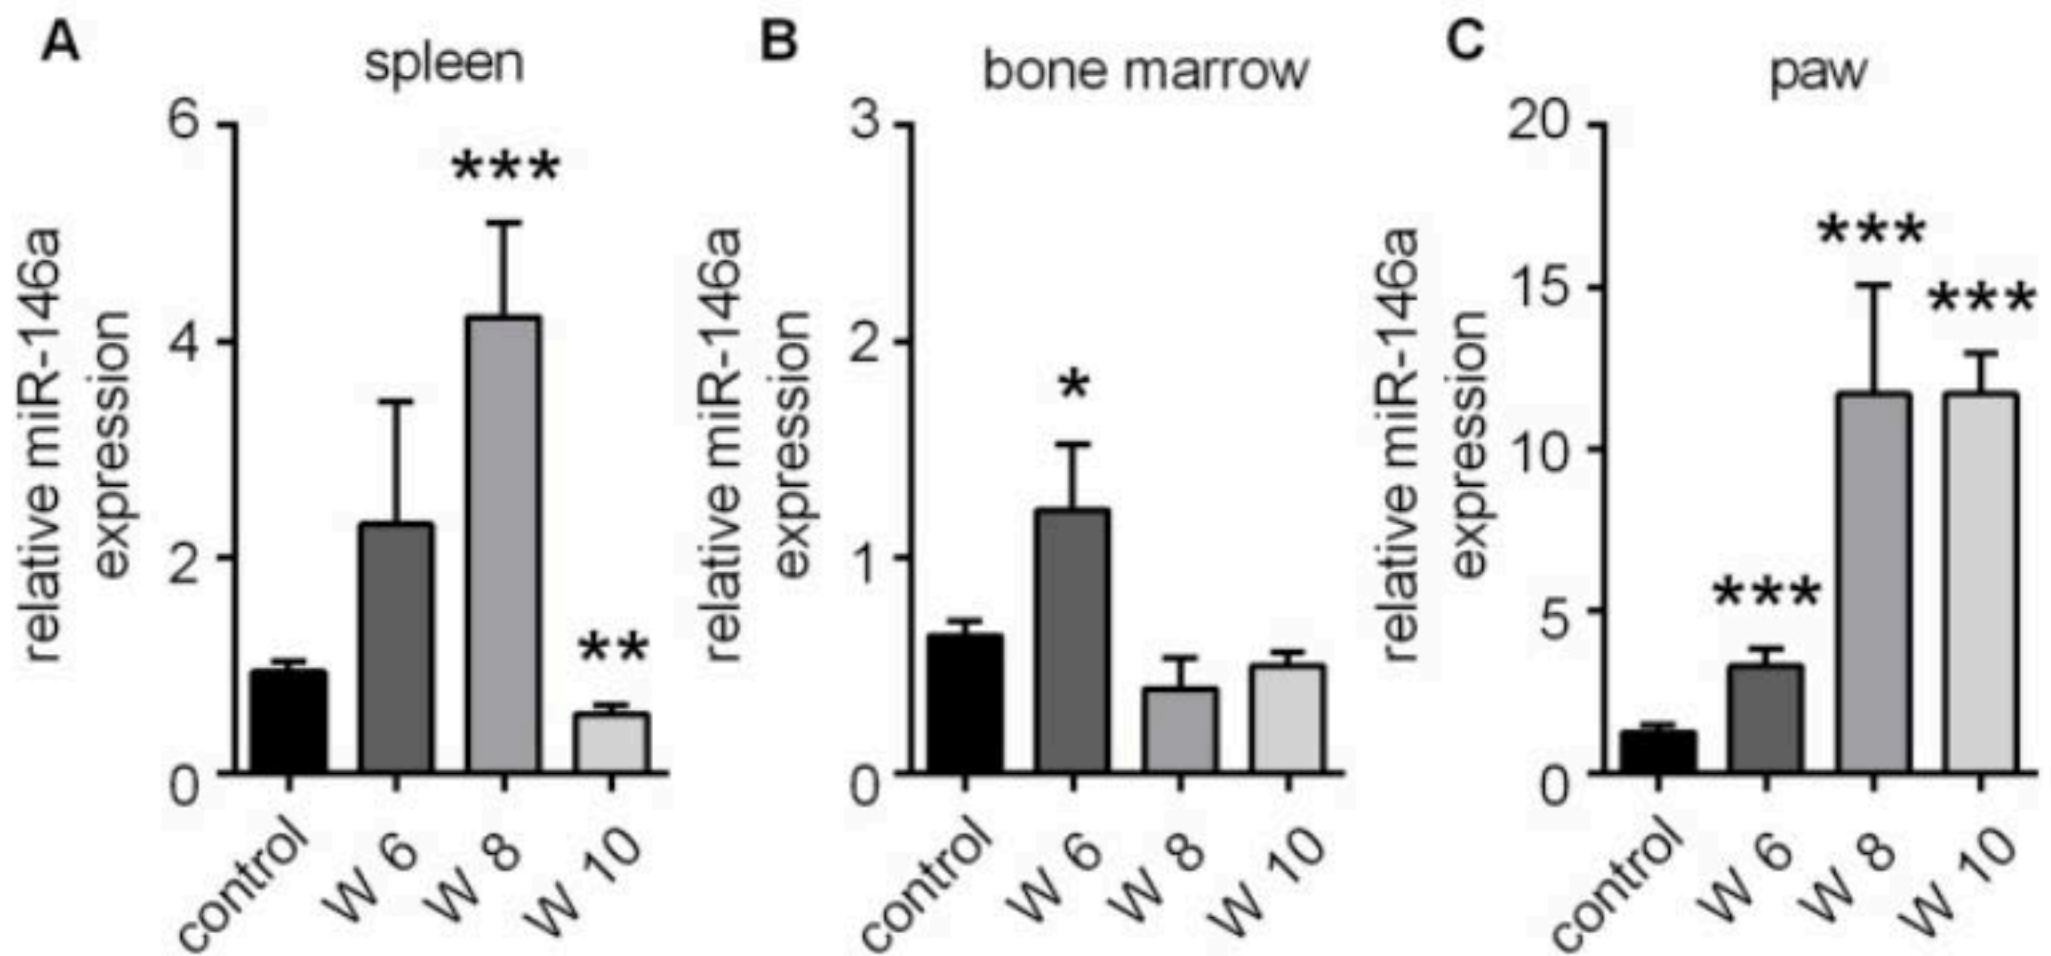

[Download](#) : [Download high-res image \(272KB\)](#)

[Download](#) : [Download full-size image](#)

**S2. Variable expression of miR-146a in lymphoid organs and locally in arthritic paws of hTNFtg animals.** A-C, Quantitative [real time PCR](#) analysis of miR-146a expression in spleen- (A), bone marrow- (B) and paw cells (C). Cells were isolated at the indicated age (weeks) of hTNFtg mice (n = 4). \*p < 0,05, \*\*p < 0,01, \*\*\*p < 0,001 as indicated or versus the control. Results are shown as mean ± SEM.

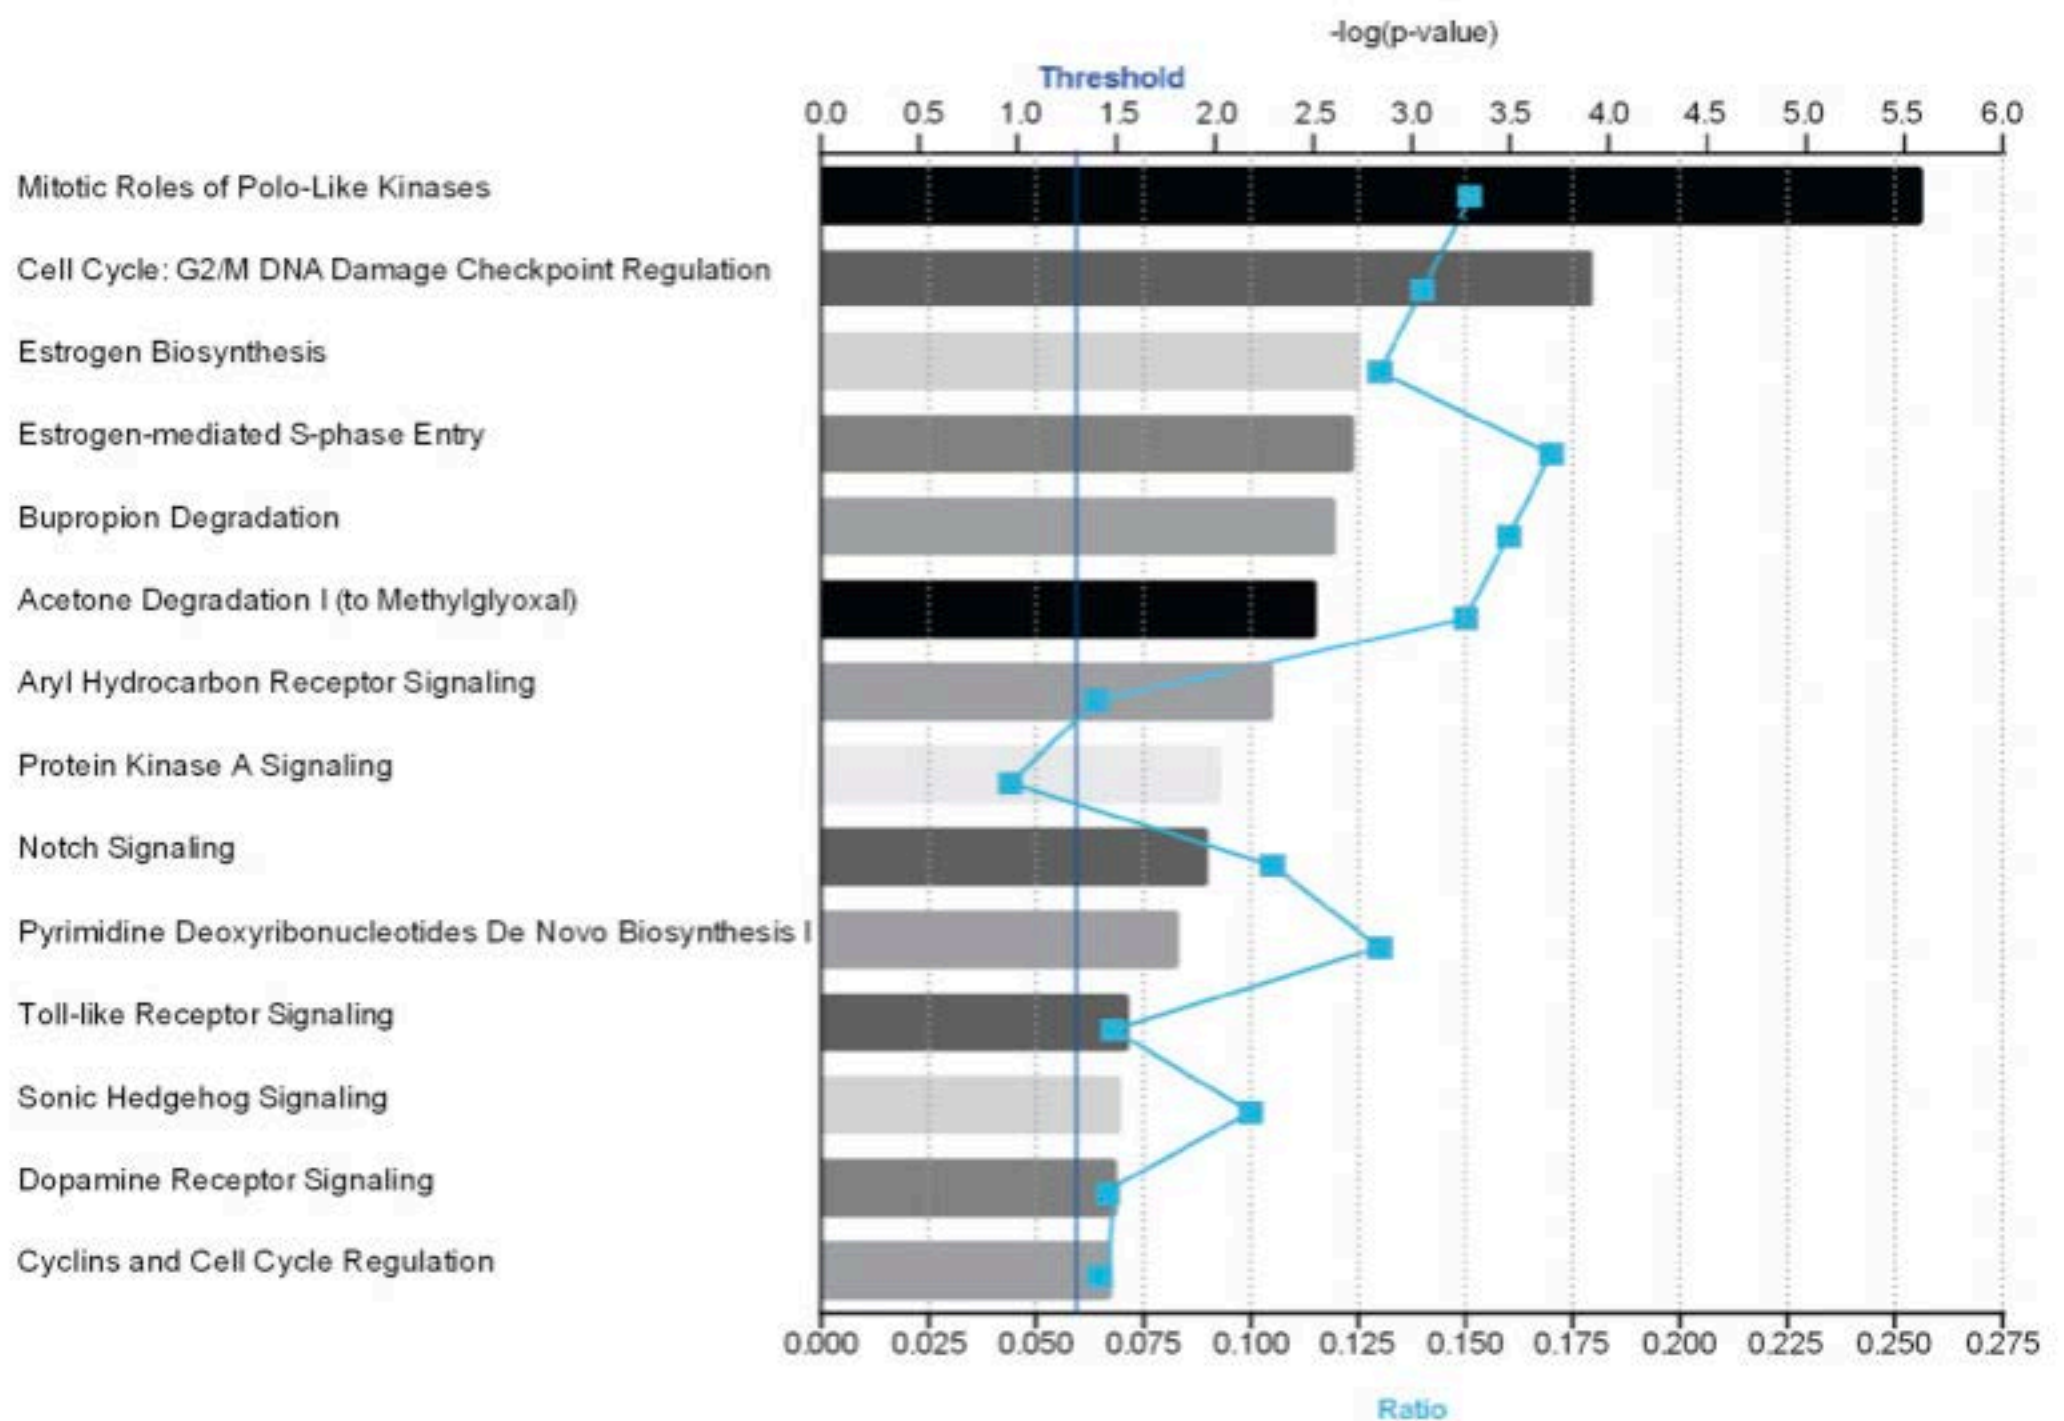

[Download : Download high-res image \(551KB\)](#)

[Download : Download full-size image](#)

S3. MiR-146a deficient **fibroblasts** show increased expression of genes involved in proliferation and pyrimidine synthesis. A, Pathways affected by loss of miR-146a in synovial fibroblasts as detected by ingenuity pathway analysis (IPA).

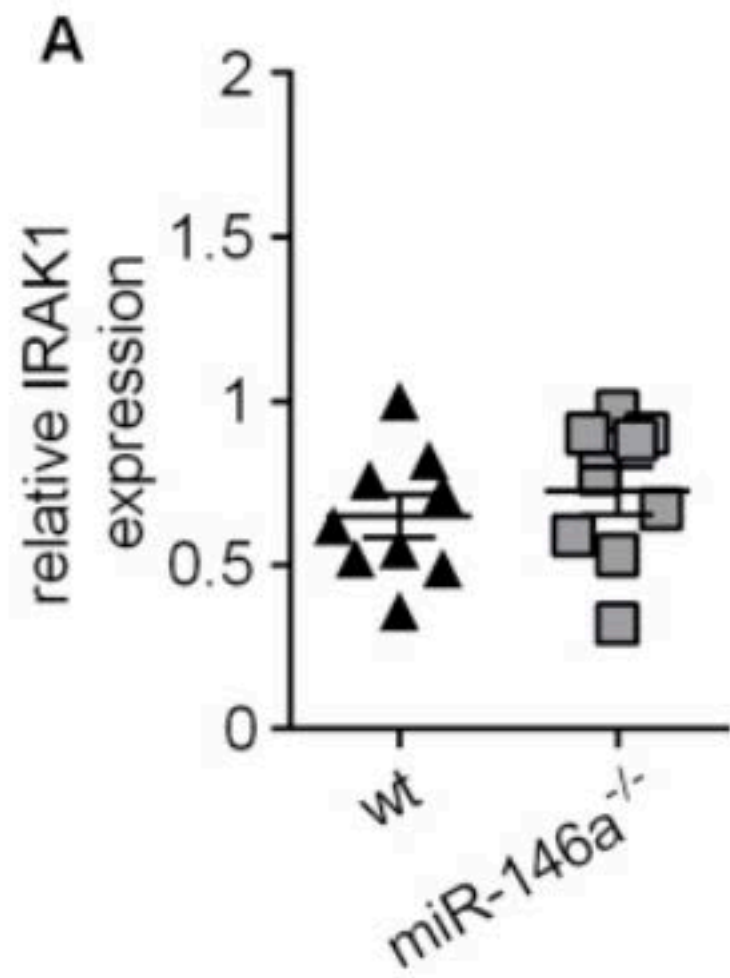

[Download](#) : [Download high-res image \(159KB\)](#)

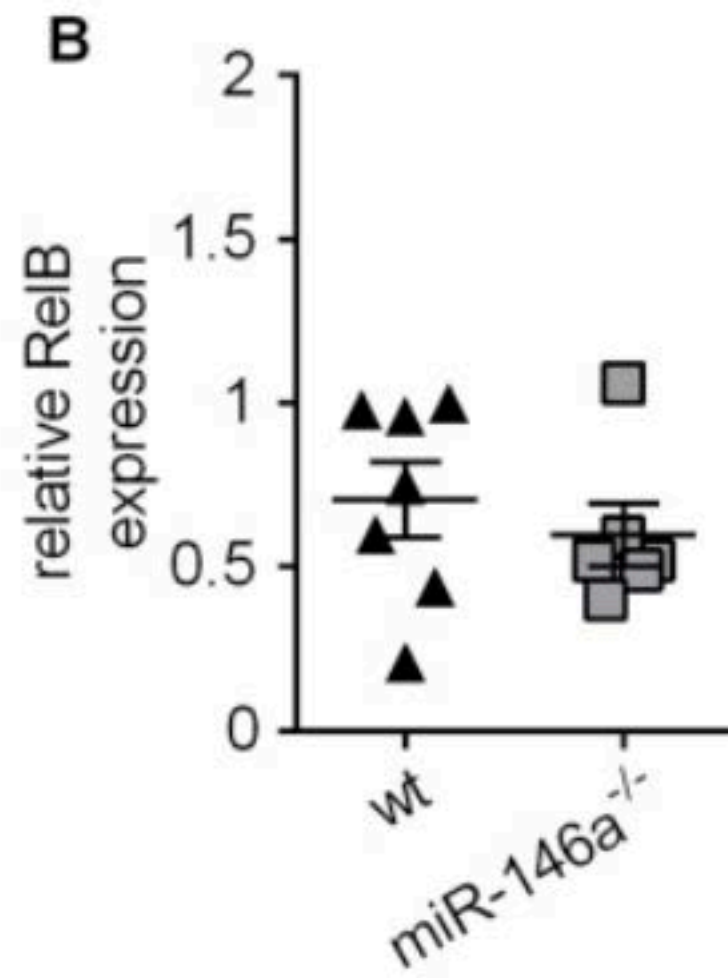

[Download](#) : [Download full-size image](#)

**S4. MiR-146a target gene expression in synovial fibroblasts.** A, Expression level of IRAK1 in synovial fibroblasts from wt (n = 9) and miR-146a<sup>-/-</sup> (n = 9) animals. B, Expression level of RelB in synovial fibroblasts from wt (n = 7) and miR-146a<sup>-/-</sup> (n = 6) animals were analyzed using quantitative real time PCR. Results are shown as mean ± SEM.

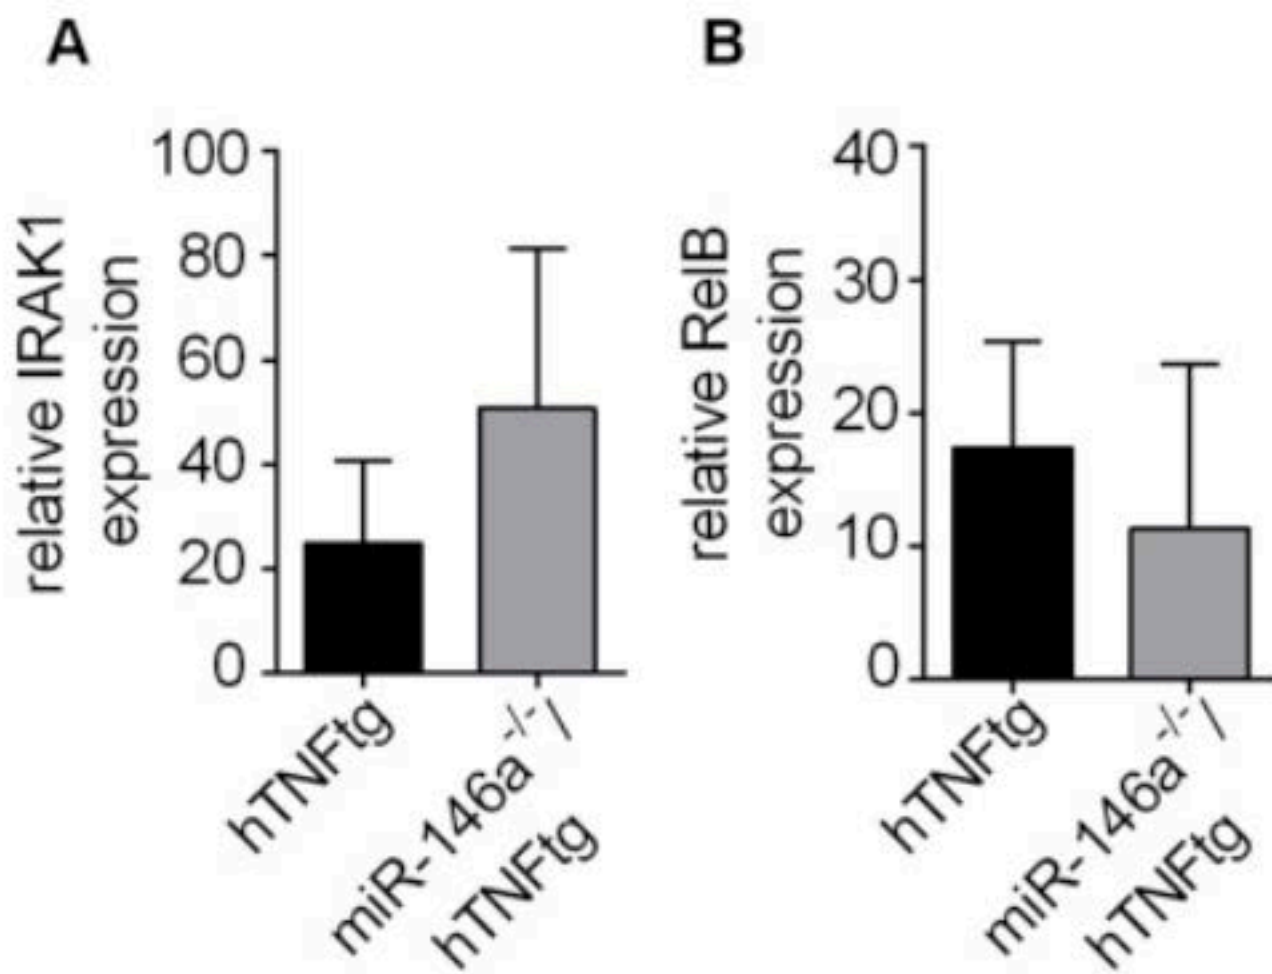

Download : [Download high-res image \(167KB\)](#)

Download : [Download full-size image](#)

**S5. MiR-146a target gene expression in hind paws of hTNFtg and miR-146a<sup>-/-</sup>/hTNFtg mice.** A, Expression level of IRAK1 in hind paws from hTNFtg (n = 5) and miR-146a<sup>-/-</sup>/hTNFtg (n = 5) animals. B, Expression level of RelB in hind paws from hTNFtg (n = 8) and miR-146a<sup>-/-</sup>/hTNFtg (n = 4) animals were analyzed using quantitative real time PCR. Results are shown as mean ± SEM.

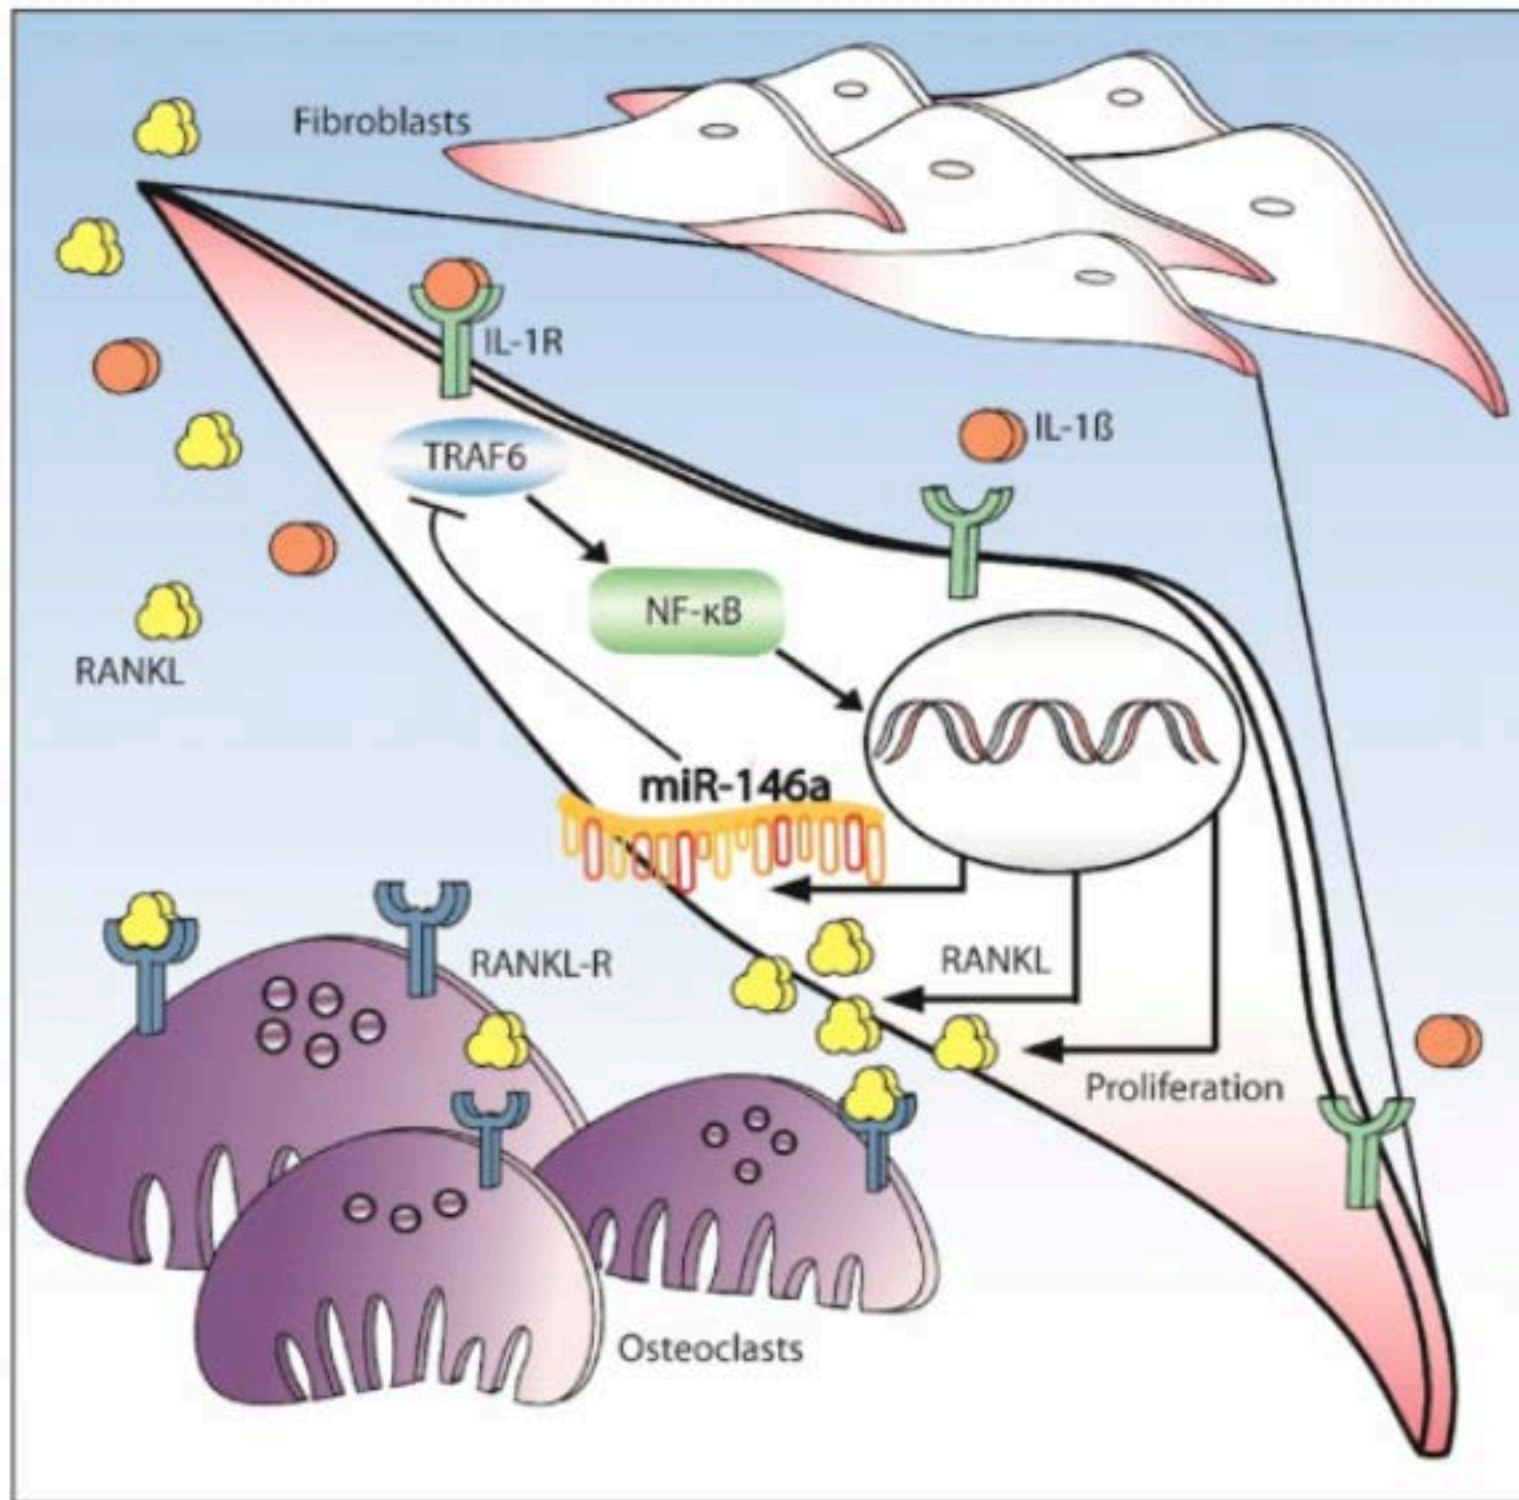

Download : [Download high-res image \(1023KB\)](#)

Download : [Download full-size image](#)

**S6. Schematically illustration of miR-146a regulatory function in synovial fibroblasts.** MiR-146a acts as a negative regulator of proliferation and RANKL production in synovial fibroblasts, through controlling the target TRAF6 in the NF- $\kappa$ B signaling pathway.

| <b>Gene</b> | <b>Sequence</b>                                                    |
|-------------|--------------------------------------------------------------------|
| TRAF6       | 5'-AAAGCGAGAGATTCTTTCCCTG-3'<br>5'-ACTGGGGACAATTCACTAGAGC-3'       |
| IRAK1       | 5'-GACCAAGTATTTGAAAGACCTG-3'<br>5'-GTAGTGCCTCCCTGGGTACA-3'         |
| RelB        | 5'-GCTGGGAATTGACCCCTACA-3'<br>5'-CATGTCGACCTCCTGATGGTT-3'          |
| OPG         | 5'-TACCTGGAGATCGAATTCTGCTT-3'<br>5'-CCATCTGGACATTTTTTGCAAA-3'      |
| RANKL       | 5'-TCGTGGAACATTAGCATGGA-3'<br>5'-CCTCTCCCAATCTGGTTCAA-3'           |
| GAPDH       | 5'-TGGCATTGTGGAAGGGCTCATGAC-3'<br>5'-ATGCCAGTGAGCTTGCCGTTTCAGC -3' |

[Download](#) : [Download high-res image \(422KB\)](#)

[Download](#) : [Download full-size image](#)

Supplementary Table 1. Primers used for real time PCR.
